# Supplementary material
Source: Springer Nature journal article supplement (https://www.springermedizin.de/resource/supplementary/12889_2005_464_MOESM2_ESM.pdf/9500926)

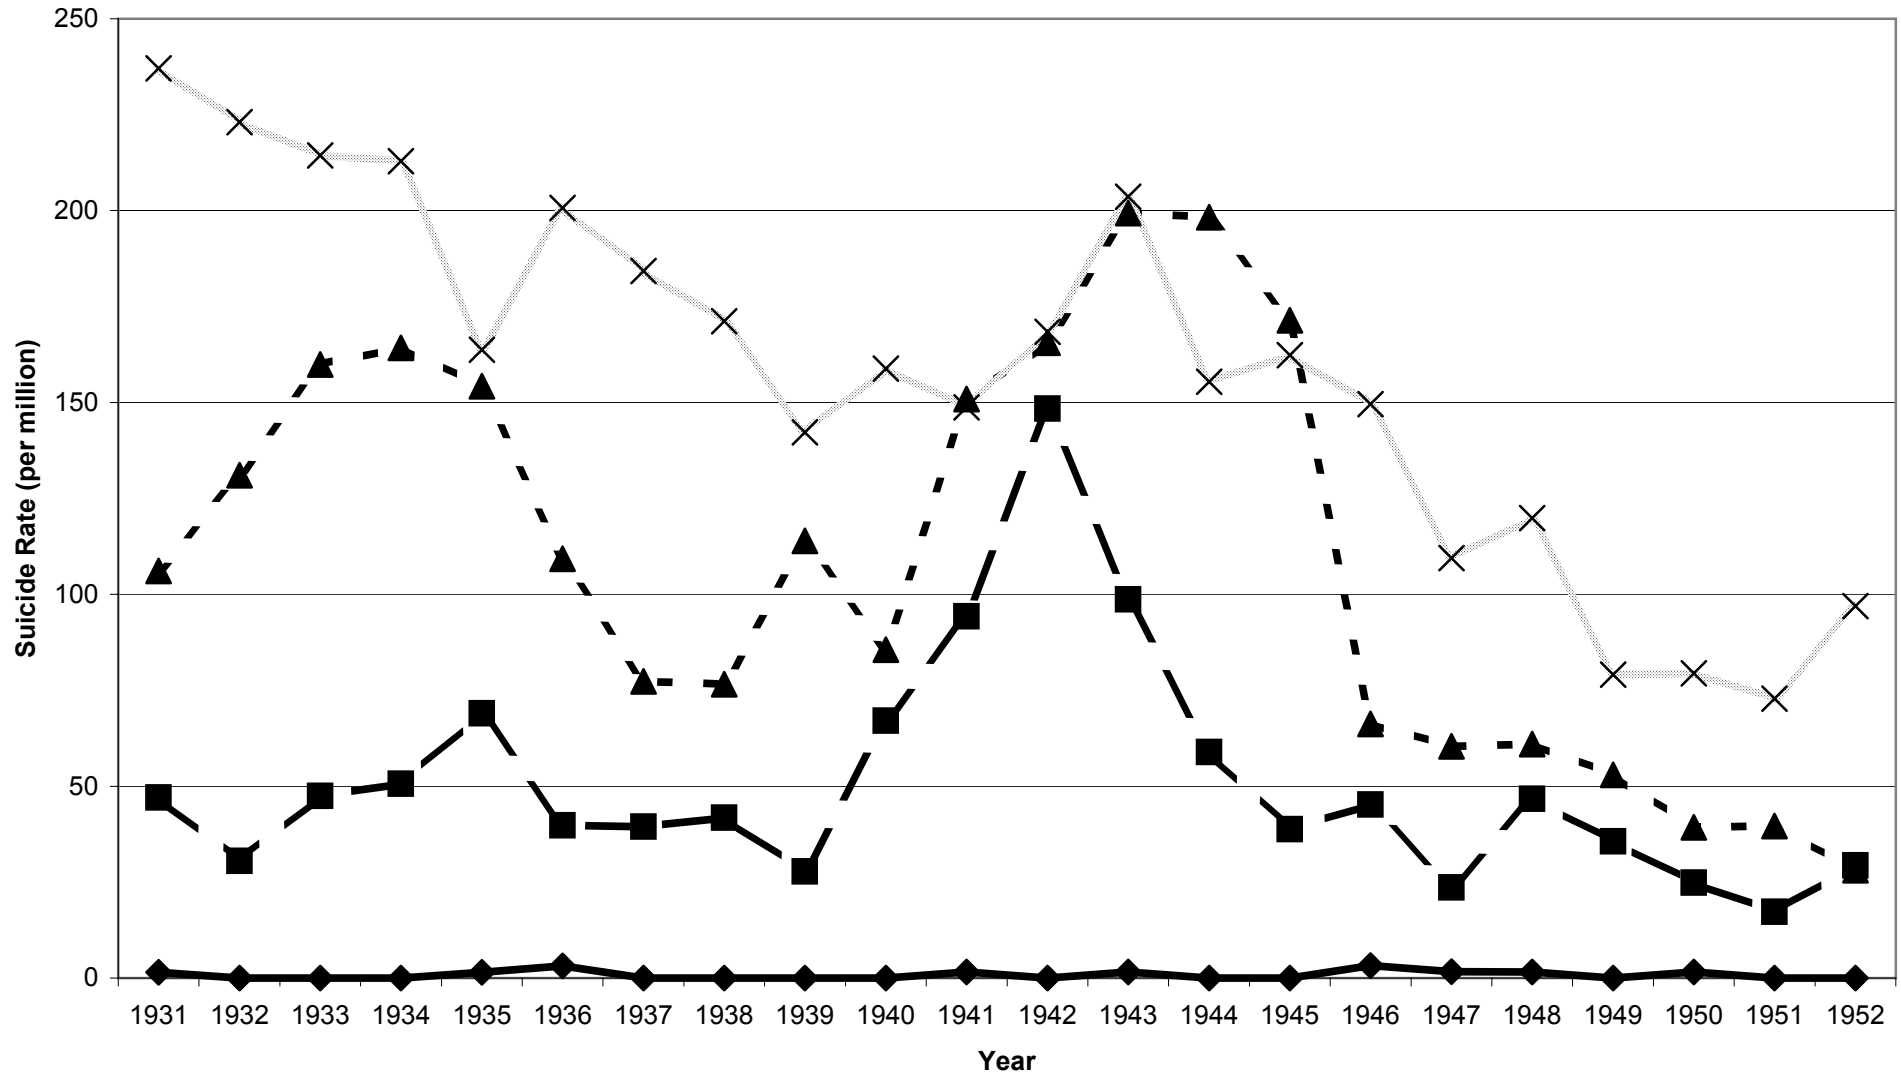

◆ <15yrs
  ■ 15-24yrs
  ▲ 25-34yrs
  × 35-44yrs

Supplement: MOESM2 [file 9500926]
